# Supplementary material for: Signatures of cell death and proliferation in perturbation transcriptomics data—from confounding factor to effective prediction
Source: PubMed Central journal article supplement (PMC6821211; doi:10.1093/nar/gkz805), 2019-09-25

**Signatures of cell death and proliferation in perturbation  
transcriptomics data - from confounding factor to effective prediction**

***Supplementary Material***

Bence Szalai<sup>1,2,\*</sup>, Vigneshwari Subramanian<sup>1</sup>, Christian H. Holland<sup>1,3</sup>, Róbert Alföldi<sup>4</sup>, László G. Puskás<sup>4</sup>, Julio Saez-Rodriguez<sup>1,3,\*</sup>

<sup>1</sup> RWTH Aachen University, Faculty of Medicine, Joint Research Centre for Computational Biomedicine (JRC-COMBINE), Aachen, Germany

<sup>2</sup> Semmelweis University, Faculty of Medicine, Department of Physiology, Budapest, Hungary

<sup>3</sup> Heidelberg University, Faculty of Medicine and Heidelberg University Hospital, Institute of Computational Biomedicine, Bioquant, 69120 Heidelberg, Germany

<sup>4</sup> Astridbio Technologies Ltd., Szeged, Hungary

\* Corresponding author:      [julio.saez@bioquant.uni-heidelberg.de](mailto:julio.saez@bioquant.uni-heidelberg.de)  
                                          [szalai.bence@med.semmelweis-univ.hu](mailto:szalai.bence@med.semmelweis-univ.hu)

## Supplementary Figure legends

### **Supplementary Figure 1 - Clustering of L1000 signatures based on different factors**

Principal Component Analysis (PCA) was performed on the perturbation signatures from the CTRP-L1000 dataset. Each point represents a unique cell line - compound - concentration - perturbation time instance. Points are colored according to cell lines (A), compound used for perturbation (B), perturbation time (C), and cell viability (E). Only selected compounds and cell lines (with the largest number of data points) are color labelled. For cell viability based clustering we selected 0.8 as the threshold for toxic / non-toxic clusters based on the histogram (D) of cell viability values (~2 SD below mean based on Gaussian Mixed model). We performed average silhouette analysis using the different clustering factors (F).

### **Supplementary Figure 2 - Enrichment and pathway activity analysis of genes showing correlated expression with cell viability**

Pearson correlations between gene expression and cell viability values were calculated for the CTRP-L1000-24h dataset (A, C, D and F) and for the Achilles-L1000-96h dataset (B, E) for each gene. Using these correlation values, KEGG pathway (A), GO term (B, C), Transcription Factor regulon (D) enrichment scores, and PROGENy pathway activity scores (E, F) were calculated.

### **Supplementary Figure 3 - Significance of cell viability score associations**

(A) The distribution of randomised signature - drug sensitivity associations. Associations between drug sensitivity (IC50) and randomised signature scores and single gene signatures were calculated using linear models ( $IC50 = f(\text{score}, \text{tissue type}, \text{MSI})$ ). The histograms show the number of significant ( $FDR < 0.05$  for score coefficient) drug - signature score associations, the dotted line shows the number of significant associations for the real model, and the proportion of random signatures showing higher number of significant associations than the real model is text labeled. To create randomised signatures, the Achilles-L1000-96h model was fitted with shuffled genes (left) or sample (middle) labels. Single gene signatures (right) used the expression of each of the L1000 genes. (B) Correlation between effect sizes (left) and  $\log_{10}$  p values (right) from the linear models using IC50 or AUC as drug sensitivity metrics. (C) Violin plots for general level of drug sensitivity (GLDS) distribution based on tissue type from GDSC data. (D) Violin plots of the division time distribution based on tissue type from gCSI data. (E) The distribution of randomised signature - GLDS partial correlations. Signature scores were calculated for GDSC cell lines using gene wise (left), sample wise (middle), randomised models or single gene expressions (right). The partial correlation between GLDS and signature score (using tissue type as covariate) was calculated. The dotted line shows the partial correlation for the real model, and the proportion of random signatures

showing a lower partial correlation than the real model is text labeled. (F) The distribution of randomised signature - doubling time partial correlations. The signature scores were calculated for gCSI cell lines using gene wise (left), sample wise (middle), randomised models or single gene expressions (right). The partial correlations between doubling time and signature score (using tissue type as covariate) were calculated. The dotted line shows partial correlation for the real model, and the proportion of random signatures showing lower partial correlation than the real model is text labeled.

#### **Supplementary Figure 4 - Effects of cell viability on MoA discovery**

(A) Removing random genes did not affect signature similarity. Random  $n$  ( $x$  axis) genes were removed from the signatures before similarity calculation. Median Spearman correlations ( $y$  axis) are shown (from random 10 experiments). (B) Comparison of ROC and PR curves. Average signatures for 327 compounds from the CTRP-L1000-24h dataset were calculated using the MODZ method, either using all genes or after removing different number of genes with the highest (absolute) correlation with cell viability. Signature similarity (Spearman correlation) was calculated for each compound pair. ROC and PR curve AUCs for MoA prediction are plotted. (C) Removing random genes does not affect MoA discovery. Random  $n$  genes (color code) were removed from signatures before similarity calculation. MoA discovery was evaluated by ROC ( $x$  axis) and PR curve ( $y$  axis) AUCs. Mean  $\pm$  SD for 10 experiments. (D-E) The effect of removing cell viability correlated genes on MoA discovery. Average signatures for 2865 compounds from the LINCS-L1000-MoA dataset was calculated using the MODZ method, either using all genes, or after removing 700 genes with the highest (absolute) correlation with cell viability. Signature similarity (Spearman correlation) was calculated for each compound pair. For comparison, chemical structure similarity (Tanimoto similarity of chemical fingerprints) was also calculated. ROC (D) and Precision Recall curves (E) were used to evaluate the predictive performance of similarity scores on drugs with shared mechanism of action. In E ( $x$  axis) shows curves between 0 and 0.2 for better interpretability.

#### **Supplementary Figure 5 - Model validation in NCI60 dataset**

(A) Distribution of effective and ineffective drugs in the NCI60-L1000-24h dataset. Delta concentration was defined as NCI60 the sensitivity metric (GI50, TGI or LC50, from left to right) minus maximal used concentration. Delta concentration 0 indicates an ineffective drug for the investigated cell line (as the drug does not have an effect in the used concentration range). (B,C) ROC and Precision Recall analysis of the prediction performance of linear models on NCI60 data. Cell viability was predicted for the intersection of NCI60 and LINCS-L1000 and for the intersection of NCI60, CTRP, and LINCS-L1000 datasets (NCI60-L1000-24h and NCI60-CTRP-L1000-24h respectively) using linear models trained on CTRP-L1000-24h or Achilles-L1000-96h data. Either these predicted cell viability values or the known AUC values from the CTRP screen (CTRP AUC) were used to predict the binarised (effective / ineffective

in the investigated concentration range) TGI (B) and LC50 (C) values from NCI60. ROC (left) and Precision Recall curves (right) were used to evaluate prediction performance.

**Supplementary Figure 6 - Maximal tested concentrations of drugs in LINCS-L1000**

Violin plots of maximal tested concentrations of non-toxic and toxic compounds from LINCS-L1000 screen and anti-cancer drugs from CTRP screen. LINCS-L1000 compounds were classified as non-toxic / toxic based on the Achilles-L1000-96h model.

**Supplementary Figure 7 - Experimental validation of prostate cancer cell line specific compound toxicity**

(A-F) Dose response curves for experimentally tested compounds in PC3 and VCaP cell lines. Cell viability was measured in triplicates after 48 hours incubation with tested compounds. Calculated IC50 values (GraphPad Prism) are shown in the inserts.

**Supplementary Figure 8 - Machine learning predictions for GDSC IC50**

The results of the machine learning models for IC50 prediction. The data was split into training and test sets based on drugs (50-50% percent). Splitting was performed 3 different ways (color code): randomly, or with constraint that for each drug in a test set there was a drug with the same nominal target in the training set (shared target), or with the constraint that for each drug in a test set there were no other drugs with shared nominal targets in the training set (different target). Different drug specific features (x axis) were used by the models. Cell wise average Pearson correlation values are shown as boxplots for the different drug specific features / splitting strategies (results from 20 random sub-sampling validation).

|                             | <b>Data type</b> | <b>Data points</b> | <b>Cell lines</b> | <b>Compounds</b> | <b>shRNAs</b> | <b>Time points</b> |
|-----------------------------|------------------|--------------------|-------------------|------------------|---------------|--------------------|
| <b>LINCS-L1000</b>          | signature        | 591697             | 98                | 21299            | 18493         | 12                 |
| <b>CTRP</b>                 | cell viability   | 6171005            | 887               | 545              | 0             | 1                  |
| <b>Achilles</b>             | cell viability   | 42893983           | 501               | 0                | 108718        | 1                  |
| <b>CTRP-L1000</b>           | matched          | 18748              | 48                | 332              | 0             | 4                  |
| <b>Achilles-L1000</b>       | matched          | 77230              | 11                | 0                | 12925         | 8                  |
| <b>CTRP-L1000-3h</b>        | matched          | 1100               | 5                 | 43               | 0             | 1                  |
| <b>CTRP-L1000-6h</b>        | matched          | 7878               | 46                | 288              | 0             | 1                  |
| <b>CTRP-L1000-24h</b>       | matched          | 9765               | 18                | 327              | 0             | 1                  |
| <b>Achilles-L1000-96h</b>   | matched          | 57639              | 10                | 0                | 10733         | 1                  |
| <b>Achilles-L1000-120h</b>  | matched          | 11431              | 2                 | 0                | 11366         | 1                  |
| <b>Achilles-L1000-144h</b>  | matched          | 7773               | 3                 | 0                | 4180          | 1                  |
| <b>LINCS-L1000-MoA</b>      | signature        | 149294             | 82                | 2865             | 0             | 4                  |
| <b>LINCS-L1000-Chem</b>     | signature        | 320694             | 83                | 21921            | 0             | 8                  |
| <b>NCI60</b>                | cell viability   | 3016553            | 159               | 52578            | 0             | 1                  |
| <b>NCI60-L1000-24h</b>      | matched          | 2160               | 6                 | 583              | 0             | 1                  |
| <b>NCI60-CTRP-L1000-24h</b> | matched          | 466                | 6                 | 99               | 0             | 1                  |
| <b>GDSC-L1000-24h</b>       | signature        | 21011              | 41                | 148              | 0             | 1                  |

**Supplementary Table 1. Descriptive statistics of the used datasets.** The table includes data type (perturbation signature, cell viability or matched), number of data points, number of cell lines, number of compounds (small molecules or biologicals), shRNAs, and time points (elapsed time between perturbation and measurement) for each used dataset.

# Supplementary Figure 1

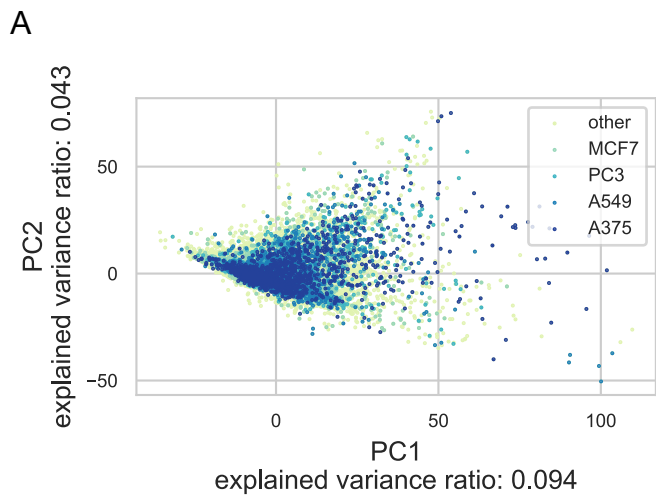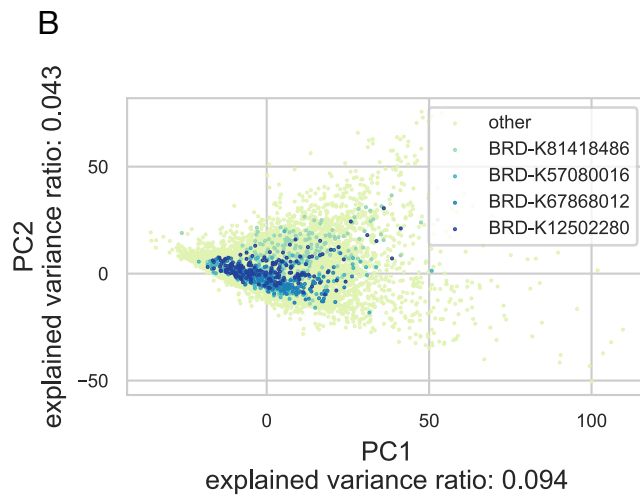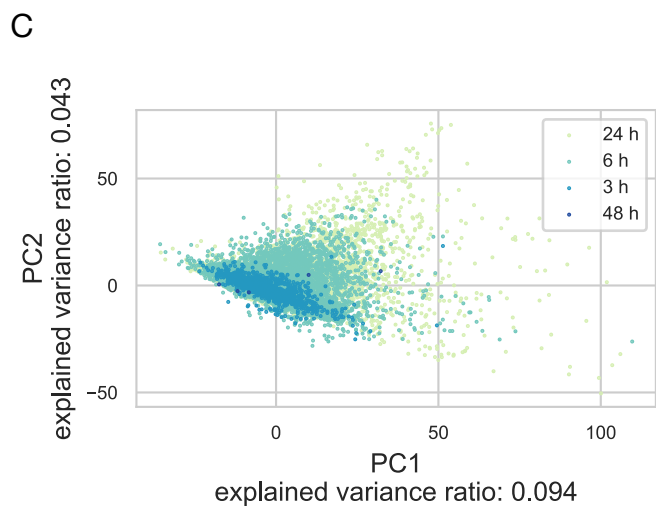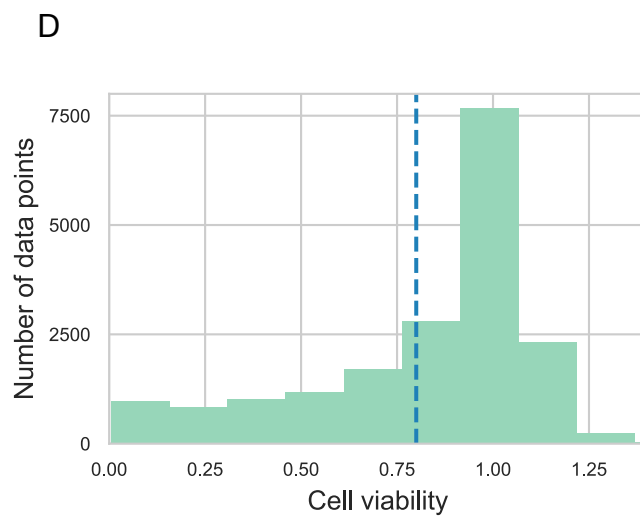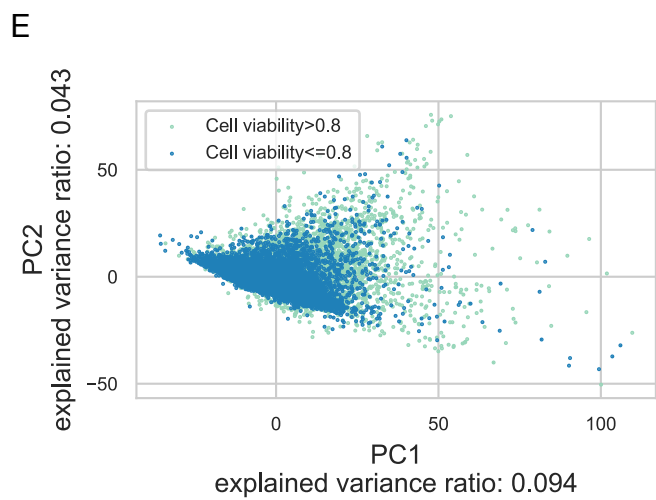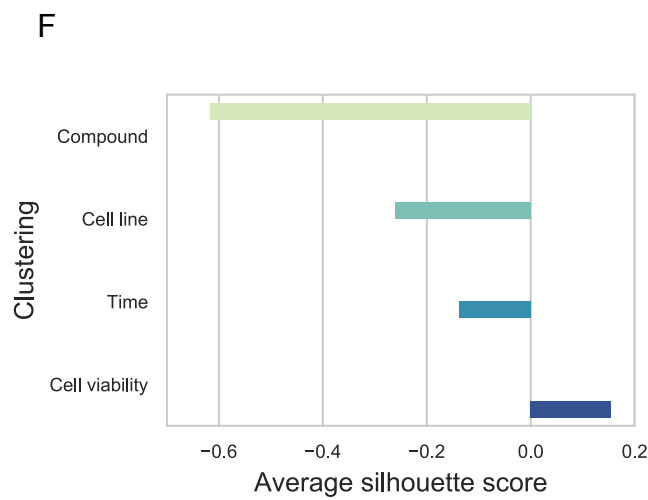

# Supplementary Figure 2

**A**

**Cell death**

| gene expression ↓                       |                  | gene expression ↑                         |                  |
|-----------------------------------------|------------------|-------------------------------------------|------------------|
| Enriched pathway                        | Adjusted p value | Enriched pathway                          | Adjusted p value |
| DNA replication                         | 0.004            | Lysosome                                  | 0.014            |
| Mismatch repair                         | 0.004            | Natural Killer cell mediated cytotoxicity | 0.029            |
| Cell cycle                              | 0.007            | B cell receptor signaling pathway         | 0.029            |
| Base excision repair                    | 0.008            | Leishmania infection                      | 0.045            |
| Nucleotide excision repair              | 0.008            | Toll-like receptor signaling pathway      | 0.067            |
| Progesterone mediated oocyte maturation | 0.008            | Insulin signaling pathway                 | 0.067            |
| Lysine degradation                      | 0.165            | Cytokine - Cytokine receptor interaction  | 0.067            |
| Huntingtons disease                     | 0.171            | Prion diseases                            | 0.067            |
| Oocyte meiosis                          | 0.171            | Chemokine signaling pathway               | 0.067            |
| Purine metabolism                       | 0.216            | T cell receptor signaling pathway         | 0.084            |

**B**

**Cell death**

| gene expression ↓                                |                  | gene expression ↑                                        |                  |
|--------------------------------------------------|------------------|----------------------------------------------------------|------------------|
| Enriched GO term                                 | Adjusted p value | Enriched GO term                                         | Adjusted p value |
| Mitotic recombination                            | 0.007            | Positive regulation of response to stimulus              | 0.02             |
| Regulation of centrosome cycle                   | 0.007            | Cellular response to organic substance                   | 0.02             |
| Cell cycle phase transition                      | 0.007            | Response to oxygen containing compound                   | 0.02             |
| Transcription coupled nucleotide excision repair | 0.007            | Response to external stimulus                            | 0.02             |
| DNA repair                                       | 0.007            | Regulation of multicellular organismal development       | 0.02             |
| Mitotic nuclear division                         | 0.007            | Defense response                                         | 0.02             |
| Coenzyme metabolic process                       | 0.007            | Anatomical structure formation involved in morphogenesis | 0.02             |
| DNA recombination                                | 0.007            | Angiogenesis                                             | 0.02             |
| DNA replication                                  | 0.007            | Regulation of ossification                               | 0.02             |
| DNA dependent DNA replication                    | 0.007            | Inflammatory response                                    | 0.02             |

**C**

**Cell death**

| gene expression ↓                                 |                  | gene expression ↑                                        |                  |
|---------------------------------------------------|------------------|----------------------------------------------------------|------------------|
| Enriched GO term                                  | Adjusted p value | Enriched GO term                                         | Adjusted p value |
| Cell cycle                                        | 0.004            | Inflammatory response                                    | 0.039            |
| Cell cycle process                                | 0.004            | Response to bacterium                                    | 0.039            |
| Mitotic cell cycle                                | 0.004            | Anatomical structure formation involved in morphogenesis | 0.039            |
| Chromosome organization                           | 0.004            | Defense response                                         | 0.039            |
| Cellular response to DNA damage stimulus          | 0.004            | Response to lipid                                        | 0.039            |
| Regulation of mitotic cell cycle                  | 0.004            | Positive regulation of multicellular organismal process  | 0.039            |
| Protein modification by small protein conjugation | 0.004            | Regulation of immune system process                      | 0.039            |
| DNA metabolic process                             | 0.004            | Negative regulation of cell communication                | 0.039            |
| Cell division                                     | 0.004            | Negative regulation of response to stimulus              | 0.039            |
| Organelle fission                                 | 0.004            | Response to external stimulus                            | 0.039            |

**D**

**Cell death**

| Transcription factor activity ↓ |       | Transcription factor activity ↑ |      |
|---------------------------------|-------|---------------------------------|------|
| Transcription factor            | NES   | Transcription factor            | NES  |
| E2F4                            | -4.22 | FOXO3                           | 3.68 |
| E2F1                            | -3.89 | SMAD4                           | 3.65 |
| TFDP1                           | -3.61 | TP53                            | 3.47 |
| LEF1                            | -2.77 | SMAD3                           | 3.22 |
| ATF1                            | -2.57 | ESR1                            | 3.07 |
| FOXM1                           | -1.79 | ESR2                            | 3.06 |
| MYC                             | -1.75 | SREBF1                          | 2.75 |
| TFAP2C                          | -1.59 | TWIST1                          | 2.74 |
| FOXA1                           | -1.09 | SRF                             | 2.61 |
| YY1                             | -1.08 | POU2F1                          | 2.59 |

**E**

**Cell death**

| Pathway activity ↓ |                            | Pathway activity ↑ |                            |
|--------------------|----------------------------|--------------------|----------------------------|
| PROGENy pathway    | Pathway activity (z score) | PROGENy pathway    | Pathway activity (z score) |
| MAPK               | -4.33                      | JAK-STAT           | 3.26                       |
| EGFR               | -2.94                      | p53                | 1.99                       |
| PI3K               | -2.92                      |                    |                            |
| Estrogen           | -2.36                      |                    |                            |
| Hypoxia            | -2.29                      |                    |                            |

**F**

**Cell death**

| Pathway activity ↓ |                            | Pathway activity ↑ |                            |
|--------------------|----------------------------|--------------------|----------------------------|
| PROGENy pathway    | Pathway activity (z score) | PROGENy pathway    | Pathway activity (z score) |
| MAPK               | -3.77                      | p53                | 3.09                       |
| PI3K               | -3.15                      | NFkB               | 2.38                       |
| Estrogen           | -2.93                      | TNFa               | 2.24                       |

# Supplementary Figure 3

A

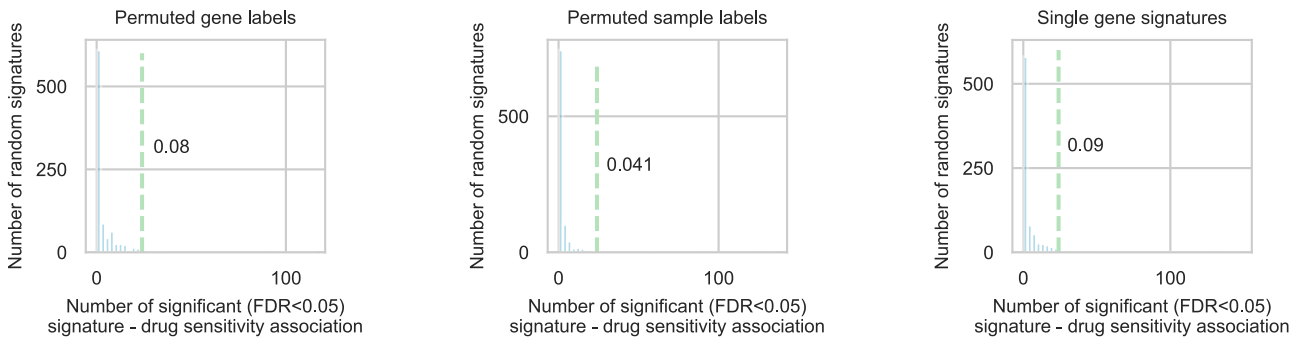

B

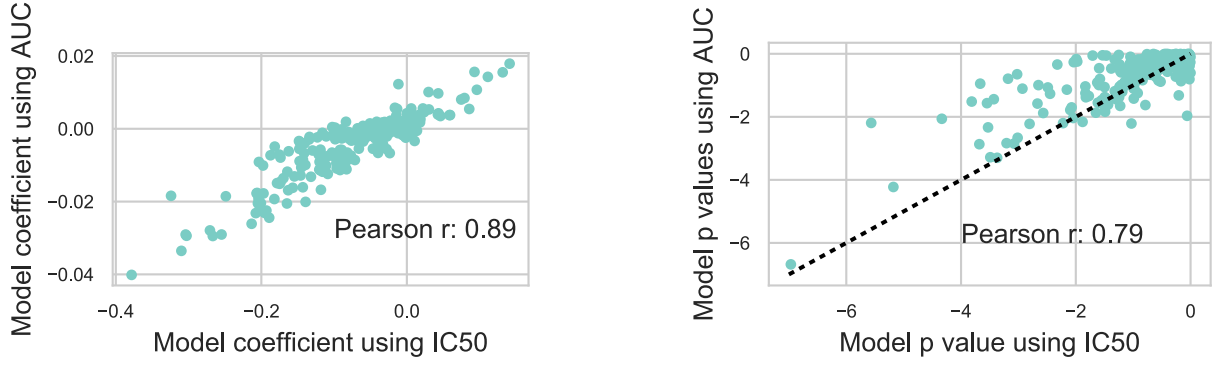

C

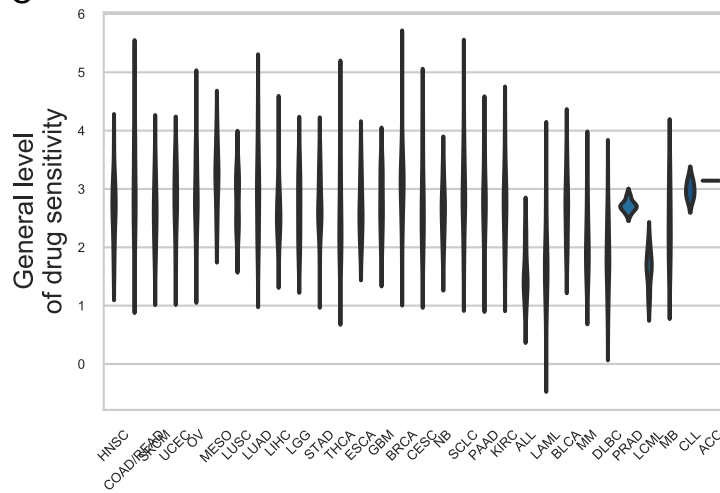

D

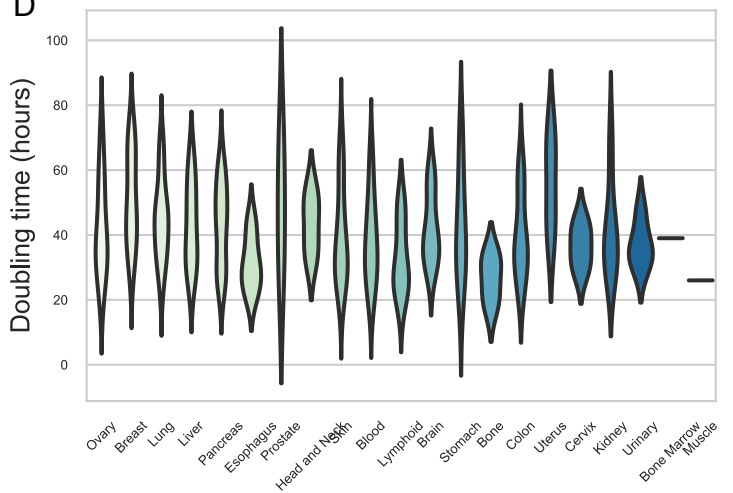

E

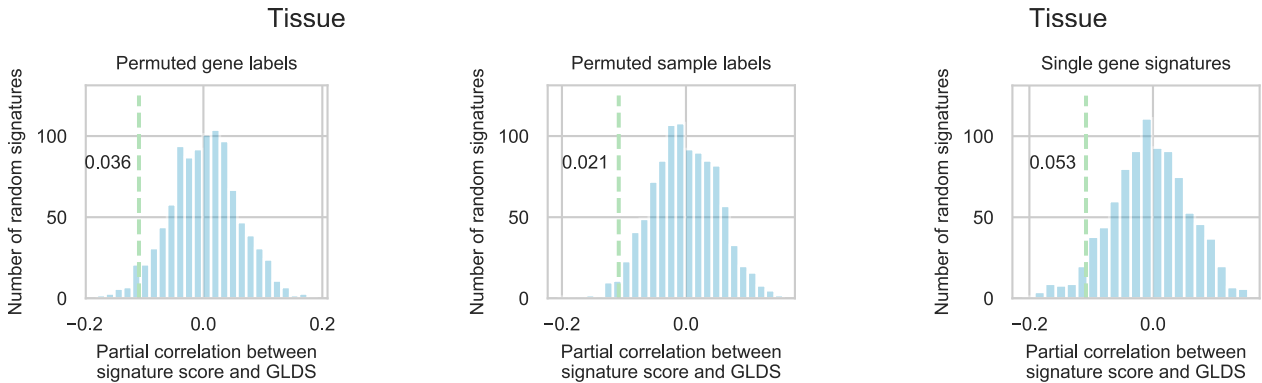

F

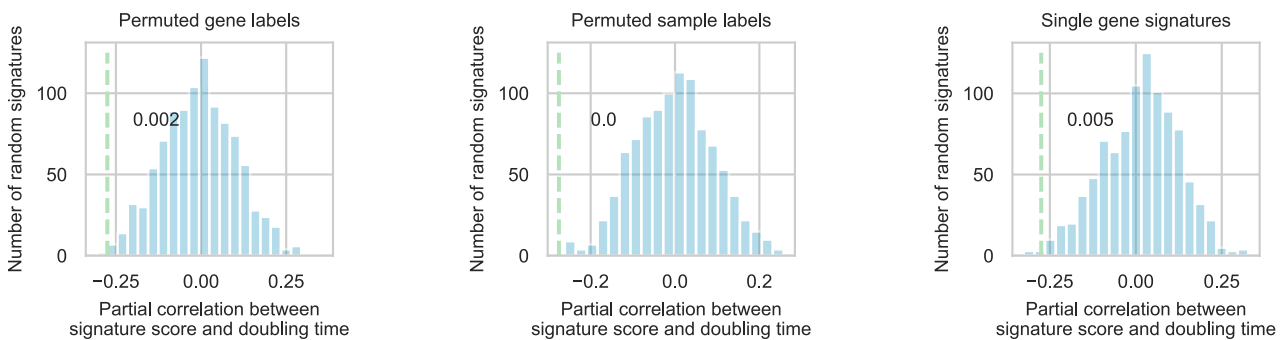



# Supplementary Figure 4

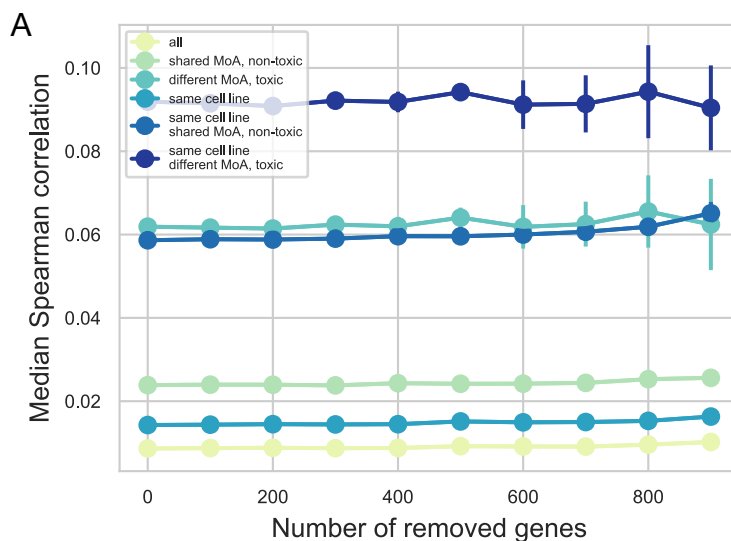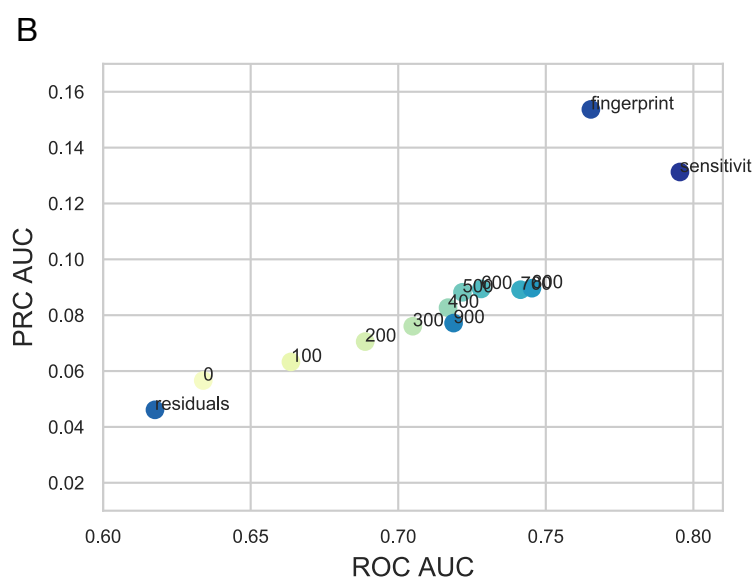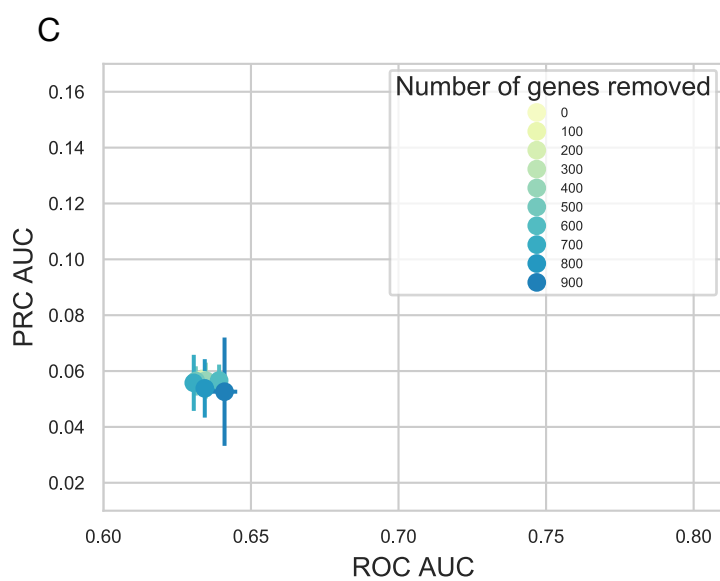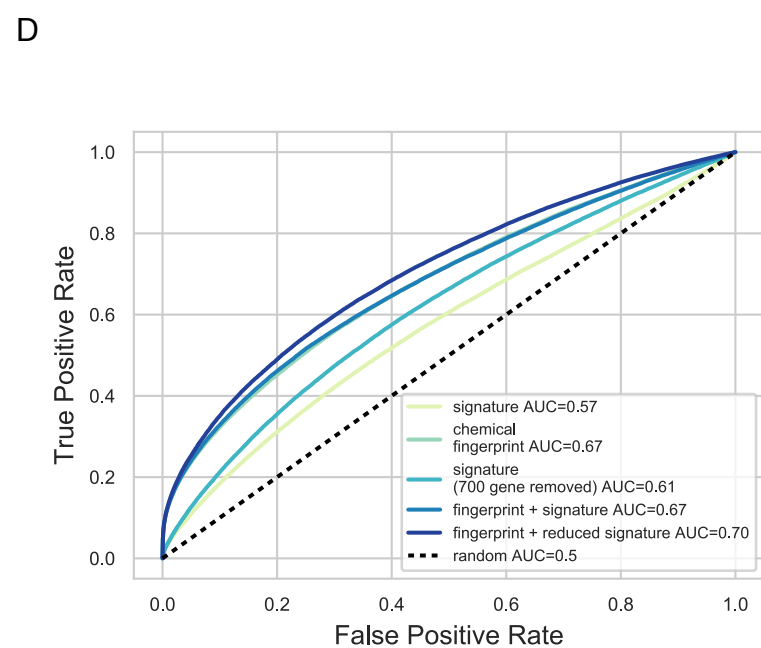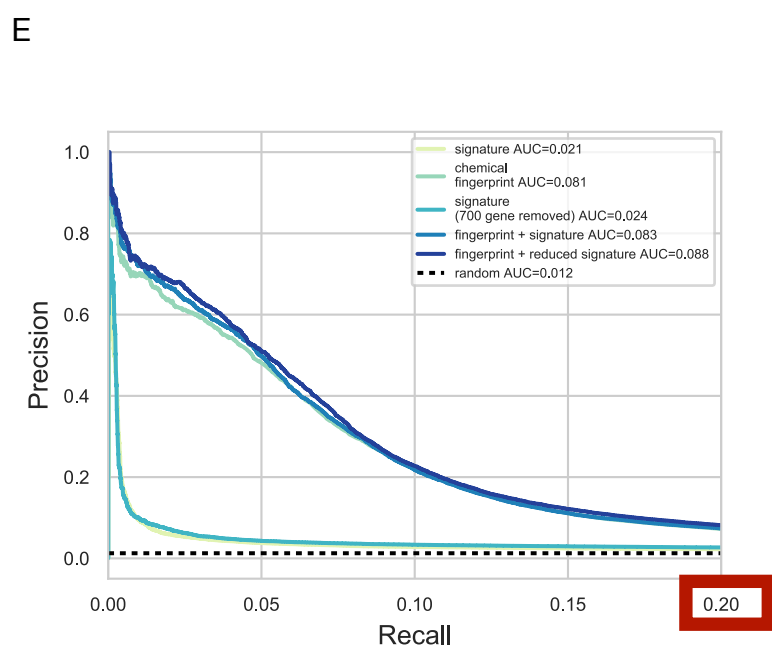

# Supplementary Figure 5

A

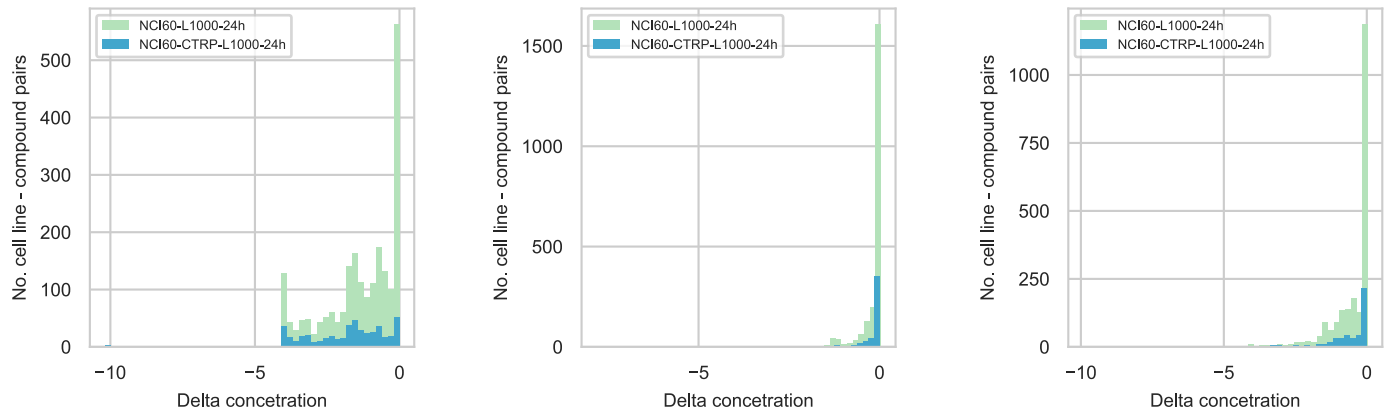

B

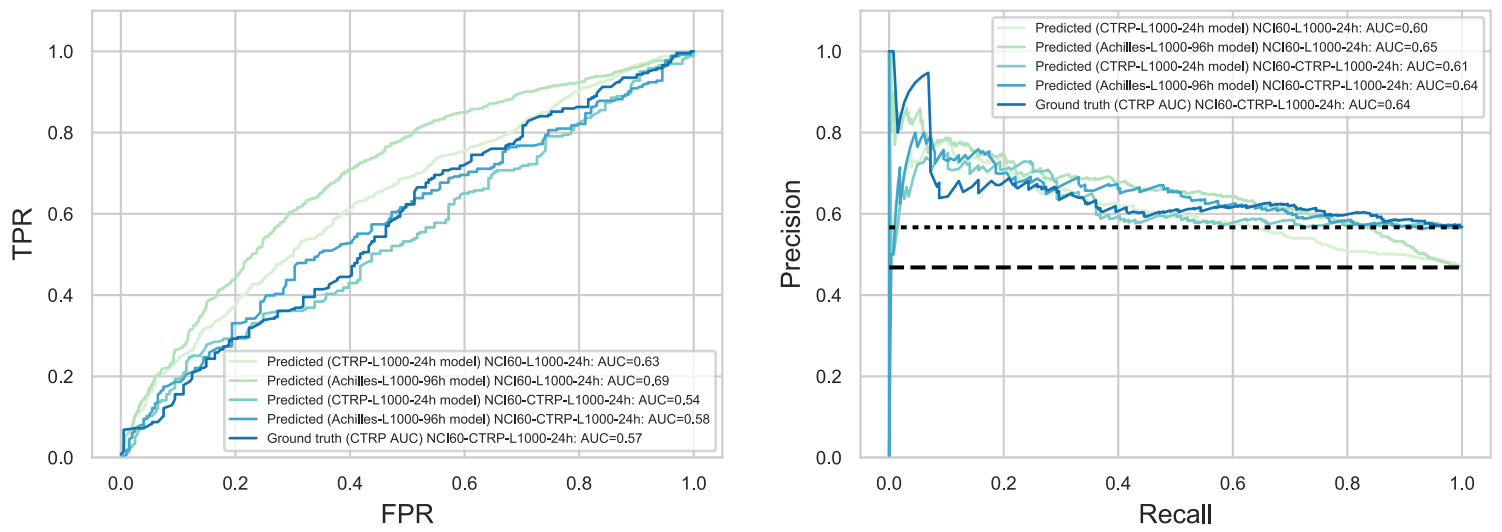

C

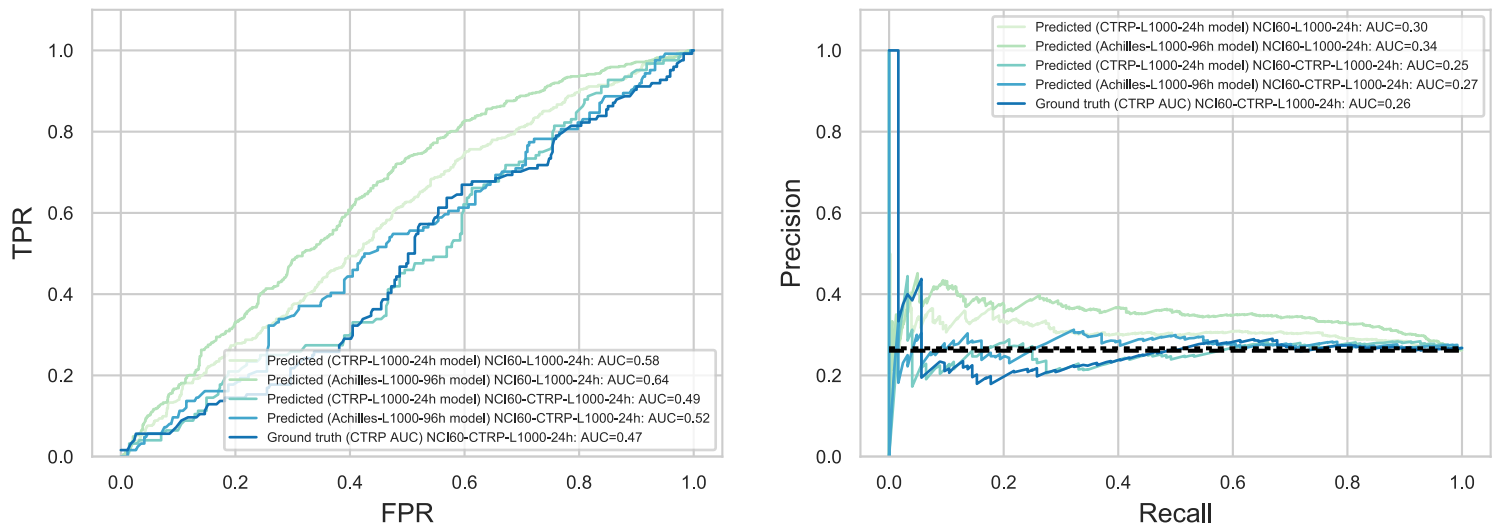

## Supplementary Figure 6

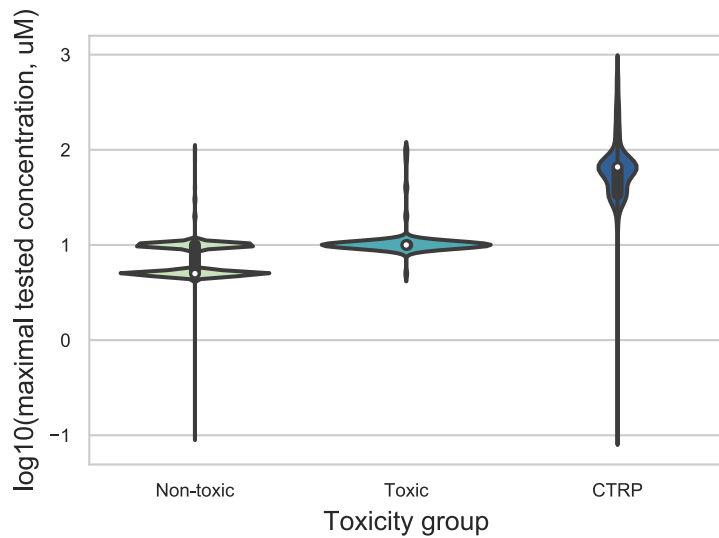

# Supplementary Figure 7

A

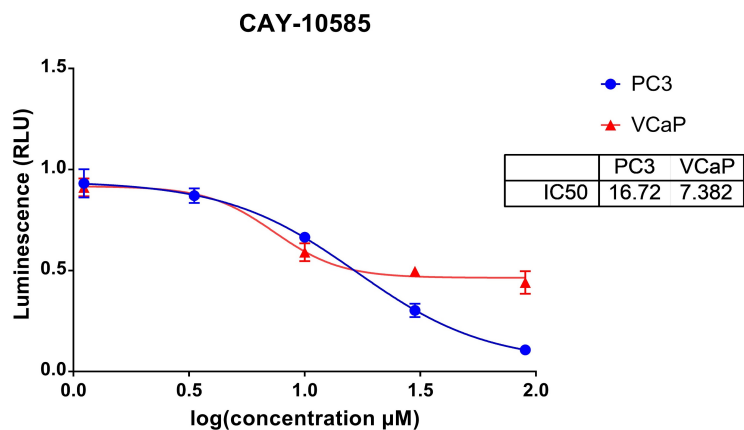

B

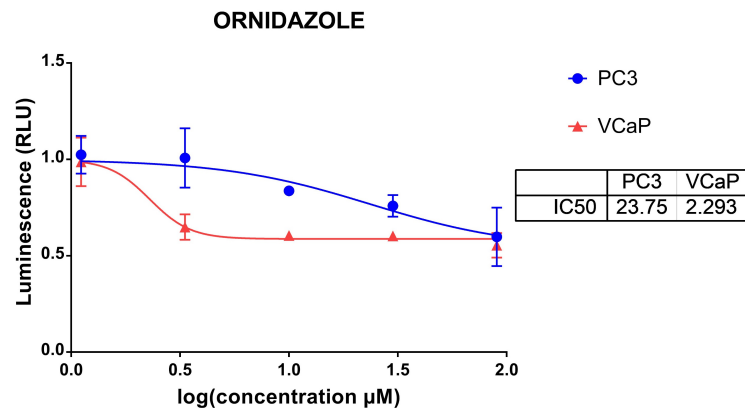

C

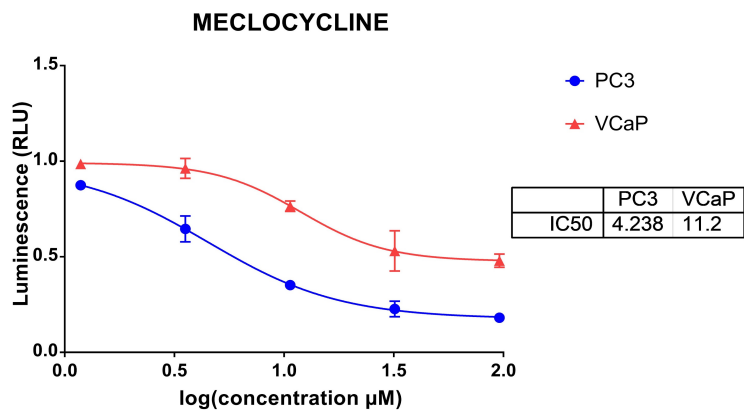

D

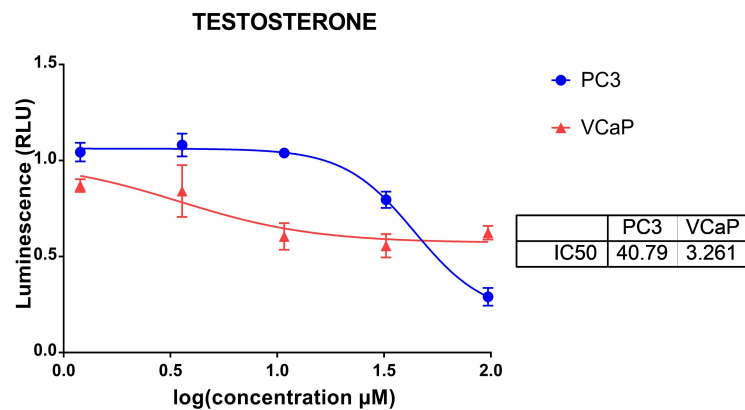

E

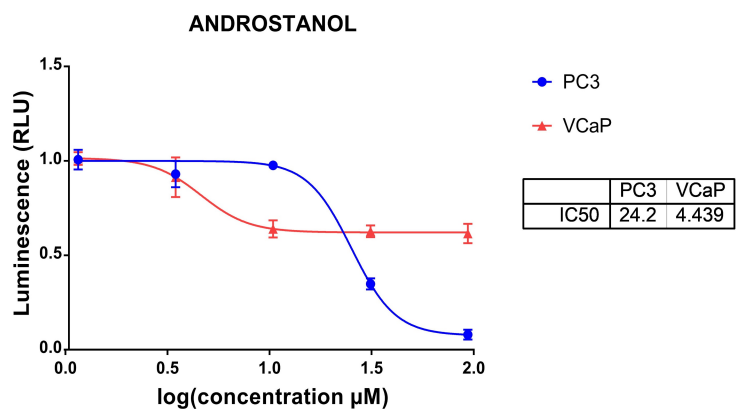

F

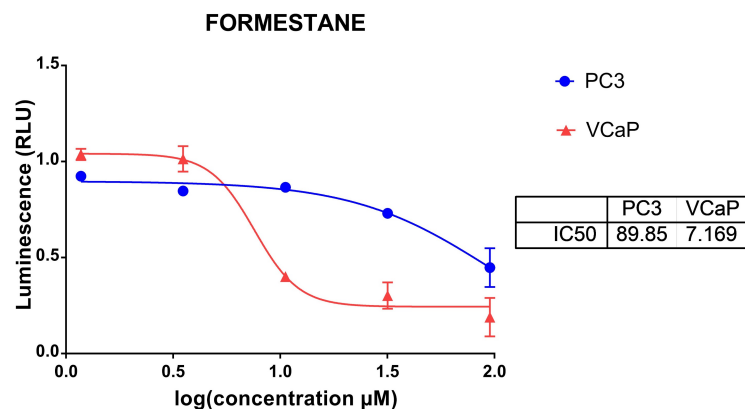

## Supplementary Figure 8

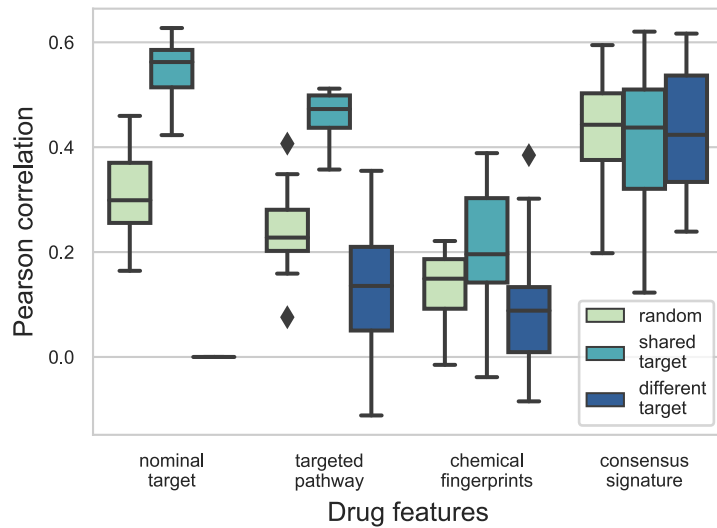

Supplement: gkz805_supplemental_file.pdf [file gkz805_supplemental_file.pdf]
